# Supplementary material
Source: Royal Society of Chemistry journal article supplement (doi:10.1039/d6mh00222f)
Supplement: d6mh00222f1.pdf [file d6mh00222f1.pdf]

**Defect-Engineered ZnO/BTO Photoanodes for Enhanced Solar-driven  
Photoelectrochemical Desalination of High-Salinity Coal Chemical Wastewater**

Jianrong Li<sup>a</sup>, Min Luo<sup>a, \*</sup>, Yipeng Zhao<sup>a</sup>, Shengbo Yuan<sup>a</sup>, Yongqing Yang<sup>a</sup>, Xiaoman Li<sup>a, \*</sup>,  
Kwan San Hui<sup>b</sup>, Fuming Chen<sup>c, \*</sup>

<sup>a</sup> State Key Laboratory of High-efficiency Utilization of Coal and Green Chemical Engineering,  
School of Chemistry and Chemical Engineering, Ningxia University, Yinchuan, Ningxia 750021,  
P. R. China

<sup>b</sup> Department of Mechanical Engineering, College of Engineering, Prince Mohammad Bin Fahd  
University, P.O. Box 1664, Al Khobar 31952, Kingdom of Saudi Arabia

<sup>c</sup> State Key Laboratory of Tropic Ocean Engineering Materials and Materials Evaluation, School of  
Chemistry and Chemical Engineering, Hainan University, Haikou, Hainan 570228, P. R. China

## Contents

- Fig. S1.** XRD patterns of BTO Precursor and ZIF-8.
- Fig. S2.** SEM image of: (a) BTO Precursor and (b) ZIF-8.
- Fig. S3.** EPR spectra of BTO<sub>Comm.</sub>, BTO and 15-ZnO/BTO: Tiv.
- Fig. S4.** Life-time of (a) BTO, (b)5-ZnO/BTO, (c)10-ZnO/BTO, (d)15-ZnO/BTO and (e)20-ZnO/BTO obtained from OCP curves.
- Fig. S5.** EIS Nyquist plots of BTO, 5-ZnO/BTO, 10-ZnO/BTO, 15-ZnO/BTO and 20-ZnO/BTO.
- Fig. S6.** Tauc plots for band gap calculation of BTO, 5-ZnO/BTO, 10-ZnO/BTO, 15-ZnO/BTO and 20-ZnO/BTO.
- Fig. S7.** The three-electrode CV curve of redox couple in electrolytes at the scan rate of 50 mV/s.
- Fig. S8.** (a) SPV spectroscopy of BTOComm, BTO, and 15-ZnO/BTO; (b) SPV spectroscopy of BTOComm, BTO, and 15- ZnO/BTO.
- Fig. S9.** Calibration curve relating NaCl concentration to conductivity.
- Fig. S10.** (a) Conductivity Variations and Brine Concentrations During Desalination of Coal Chemical High-Salinity Wastewater with Different Initial Concentrations (3006, 6912, and 12370 ppm); (b) Desalination Performance of Coal Chemical High-Salinity Wastewater with Different Initial Concentrations (3006, 6912, and 12370 ppm).
- Fig. S11.** (a) Influence of Different Light Intensities (50, 100, and 200 mW/cm<sup>2</sup>) on Conductivity Variations and Brine Concentrations During Desalination of Coal Chemical High-Salinity Wastewater; (b) Desalination Performance of Coal Chemical High-Salinity Wastewater Under Different Light Intensities (50, 100, and 200 mW/cm<sup>2</sup>).
- Fig. S12.** (a) Conductivity changes and salt concentration of the 15-ZnO/BTO photoanode during ten cyclic testing; (b) Desalination performance of the 15-ZnO/BTO photoanode during ten cycling tests.
- Fig. S13.** (a)XRD patterns of 15-ZnO/BTO before/after cycling experiment, (b) SEM images of 15-ZnO/BTO before cycling and after cycling.
- Fig. S14.** Calibration curves for ion quantification.
- Table S1.** List of abbreviation.
- Table S2.** Salt removal rates and photocurrent data for BTO<sub>Comm.</sub>, BTO and 15-ZnO/BTO

photoanodes.

**Table S3.** ICP-OES results of leached ions in different streams after desalination.

**Table S4.** Initial and final water quality of the high-salinity wastewater treated by SD-PED.

**Table S5.** Summary of solar desalination performance in this work.

**Table S6.** Comparison with recent reports on solar-driven photoelectrochemical desalination.

**Table S7.** Economic cost for SD-PED device in this work.

**Table S8.** Comparative assessment of energy efficiency and overall system cost for SD-PED technology versus conventional desalination technologies (electricity cost: 0.093 USD/ kW·h).

## S1. Additional experimental details

### S1.1 Photoanode-Assisted Electrochemical Desalination (PA-ED) Device

The PA-ED device contains two redox streams and two salt streams separated by ion-exchange membranes. The redox electrolyte was circulated using a peristaltic pump. The salt feed (NaCl solution or real high-salinity wastewater, 10 mL) was circulated in the salt channels, and the salt concentration was monitored using a conductivity meter. The active area of each electrode plate was 1 cm<sup>2</sup> and the device thickness was 4 mm. The chambers and conductivity-detection cells were made of polytetrafluoroethylene (PTFE) and equipped with inlet/outlet ports for capillaries.

Redox electrolyte: a mixture of 0.03 M I<sub>2</sub> and 1.0 M NaI with an additive (as prepared in the experiments) in a total volume of 10 mL. The flow rate is controlled at 1 mL/min using a soft tube with an inner diameter of 1.5 mm.

### S1.2 Solar-driven desalination evaluation

Desalination performance was evaluated using a photoelectrochemical system under zero-bias conditions. A xenon lamp (CEAULIGHT CEL-S500) was served as the light source, with incident irradiance quantified by a UV-365 solar radiometer (Beijing Shida Photoelectric Technology). Electrochemical measurements, including chronoamperometry (CA) and constant-current discharge profiles, were conducted on a DH7003 workstation (DONGHUA). The flow rates in both salt and redox chambers are maintained at 5 mL/min using a peristaltic pump (Kamoer NP04-KCS-B146). The conductivity of the salt solution was monitored in real time using a DDSJ-308F conductivity meter.

The salt removal rate (SRR, μg/(cm<sup>2</sup>·min)) represents the desalination ability of PEC desalination per time unit and active region, which can be calculated using the below equation:

$$SRR = \frac{\frac{\Delta c}{\Delta t} \times V}{A_{Cell}} \quad (1)$$

Where  $\frac{\Delta c}{\Delta t}$  represents the salt concentration change per minute (mg/(L·min)), V is the total volume of one salt chamber (mL), and A<sub>cell</sub> represents the active area of the PEC desalination device (cm<sup>2</sup>).

The solar desalination capacity (E<sub>c</sub>, μmol/J) is calculated as follows:

$$E_c = \frac{\Delta c \times V \times 10^6}{P \times \Delta t \times A_{Cell}} \quad (2)$$

### S1.3 Photoelectrochemical measurements and calculations

The electrochemical cyclic voltammetry (CV) was performed on a workstation (CHI660D). The measurement of I-V curve, Mott-Schottky, open-circuit voltage (OCP-t) and EIS were measured using an electrochemical workstation (CHI760E). A standard three-electrode system was employed, consisting of a photoanode as working electrode, an Ag/AgCl as reference electrode and a Pt sheet as counter electrode, as well as a 0.1 M K<sub>2</sub>SO<sub>4</sub> as electrolyte solution (pH=7).

The key equations used in analysis are listed as follows:

$$\tau = -\frac{\kappa_B T}{e} \left( \frac{dOCP}{dt} \right)^{-1} \quad (3)$$

where  $\tau$  represents the lifetime of photogenerated carriers,  $\kappa_B$  represents thermal energy ( $1.38 \times 10^{-23} \text{ J} \cdot \text{K}^{-1}$ ),  $e$  represents the charge power ( $1.602 \times 10^{-19} \text{ C}$ ), and  $T$  represents thermodynamic temperature (293.15 K).

$$(\alpha h\nu)^{1/n} = A(h\nu - E_g) \quad (4)$$

Where the parameters of the Tauc equation are defined as follows:  $\alpha$  (absorption coefficient),  $h\nu$  (photon energy),  $A$  (absorbance), and  $E_g$  (bandgap energy). The exponent  $n$  takes values of 1/2 and 2, corresponding to direct bandgap and indirect bandgap semiconductors, respectively.

$$E_{VB,NHE} = \phi + E_{VB,XPS} - 0.44 \quad (\phi = 2.20 \text{ eV}) \quad (5)$$

Where  $E_{VB}$  and  $\phi$  represent the valence band potential of the semiconductor and the work function of the instrument, respectively.

$$(E_{VB} = E_{CB} - E_g) \quad (6)$$

Where  $E_{VB}$ ,  $E_{CB}$  and  $E_g$  are defined as the valence band potential, conduction band potential, and band gap of the semiconductor, respectively.

$$E_{F,redox} = -4.5 \text{ eV} - e_0 E_{redox} \quad (7)$$

Among them,  $E_{redox}$  and  $E_{F,redox}$  are the redox potential and the Fermi level of the redox species respectively, and  $e_0 = 1$  (electron). According to equation (7),  $E_{F,redox}$  was measured to be -5.25 eV, which is lower than the valence band position of ZnO. From a thermodynamic perspective, the redox species in the electrolyte can inject holes into the valence band of the photoanode, thereby driving the redox reaction.

#### S1.4 Characterization

Structural and compositional characterization was systematically performed using multi-technique analysis. Phase identification was measured by using a Bruker D8 ADVANCE A25 XRD system (Cu  $K\alpha$  radiation). Raman spectroscopy was conducted on a LabRam HR Evolution spectrometer with 455 nm laser excitation. Microstructural analysis was performed using, (1) a Thermo Scientific Quattro S field-emission SEM equipped with EDAX ELECT P; (2) a FEI Talos F200X TEM with energy-dispersive X-ray spectroscopy (EDX) system. Surface chemistry was investigated by using X-ray photoelectron spectroscopy (XPS, USA, Thermo Scientific K-Alpha). In-situ irradiation XPS (SI-XPS) spectra were obtained on the ESCALAB 250Xi (Thermo Fischer, USA) X-ray photoelectron spectrometer. The Fourier transform infrared (FT-IR) spectra were acquired using a Nicolet iN10 micro-FTIR spectrometer (Thermo Scientific, USA) with KBr pellets (1:100 sample/KBr ratio), Optoelectronic properties were evaluated by UV-vis diffuse reflectance spectra (UV-vis DRS) (TU-1900, Pu-Analysis Inc). Electron paramagnetic resonance (EPR) spectra were obtained on the (Bruker is 5 A300, Germany) paramagnetic resonance spectrometer.

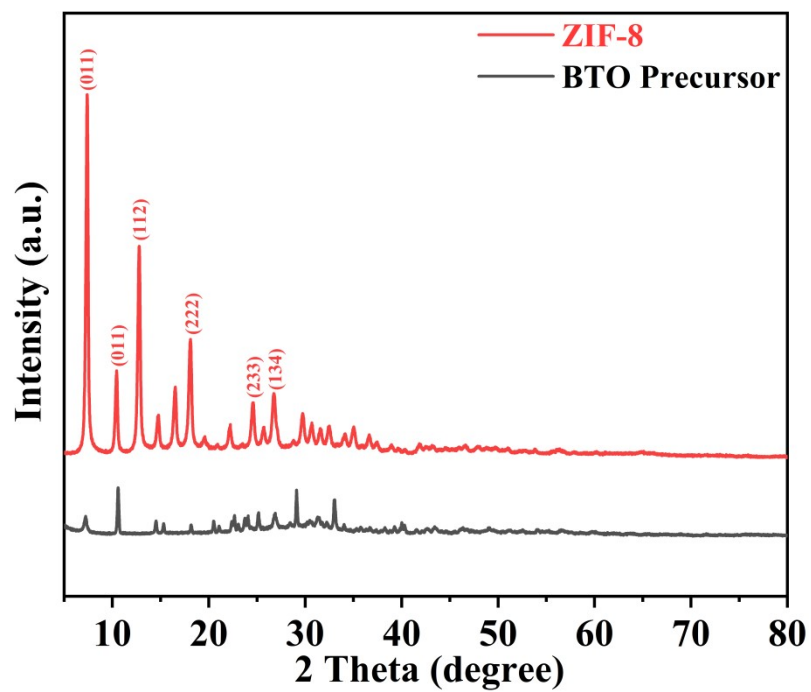

Fig. S1. XRD patterns of BTO Precursor and ZIF-8.

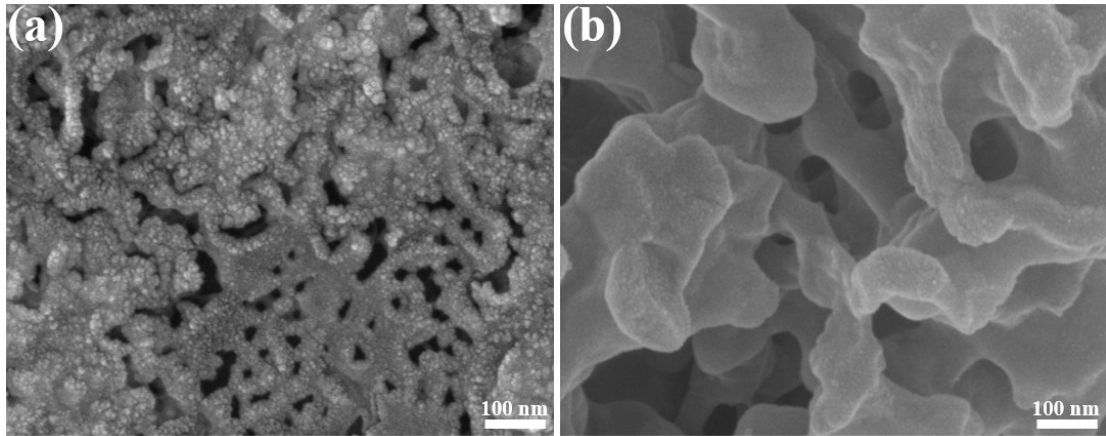

**Fig. S2.** SEM image of: (a) BTO Precursor and (b) ZIF-8.

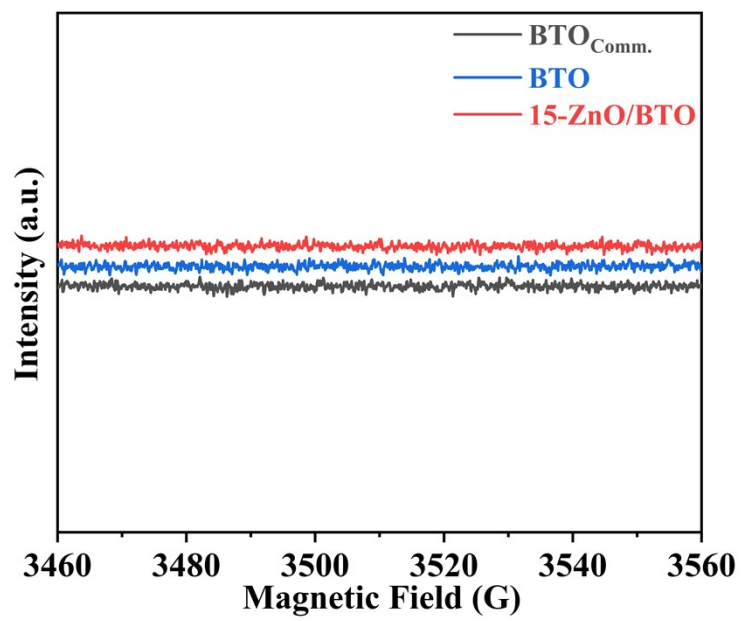

**Fig. S3.** EPR spectra of BTO<sub>Comm.</sub>, BTO and 15-ZnO/BTO: Tiv.

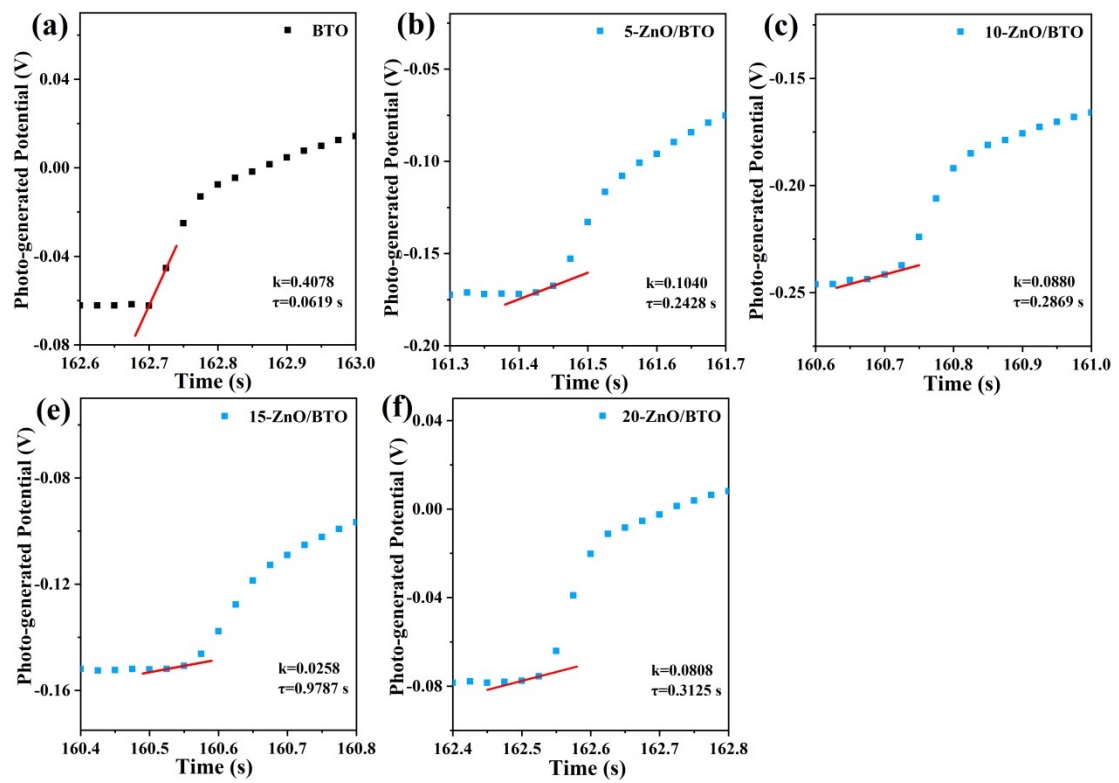

Fig. S4. Life-time of (a) BTO, (b)5-ZnO/BTO, (c)10-ZnO/BTO, (d)15-ZnO/BTO and (e)20-ZnO/BTO obtained from OCP curves.

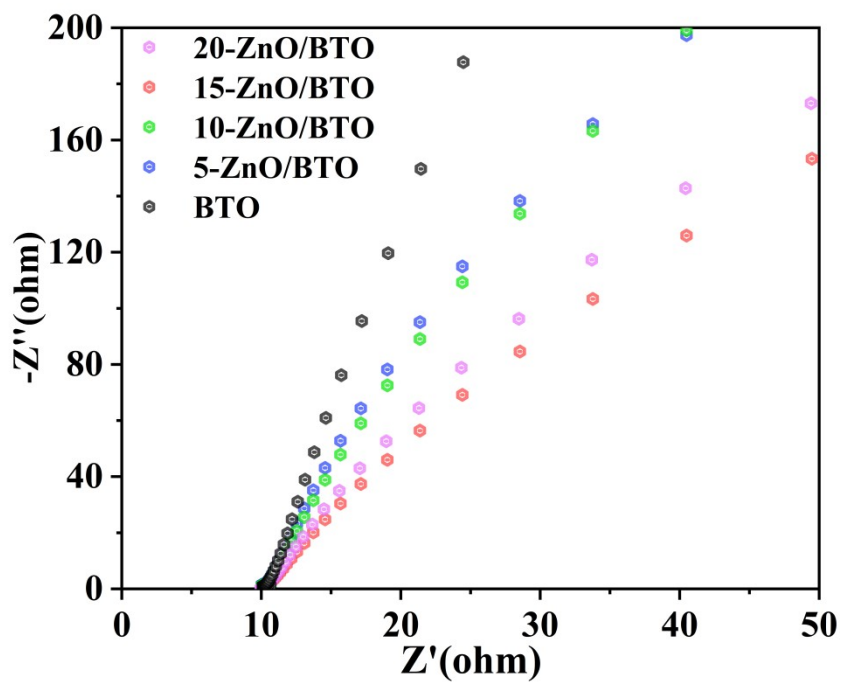

Fig. S5. EIS Nyquist plots of BTO, 5-ZnO/BTO, 10-ZnO/BTO, 15-ZnO/BTO and 20-ZnO/BTO.

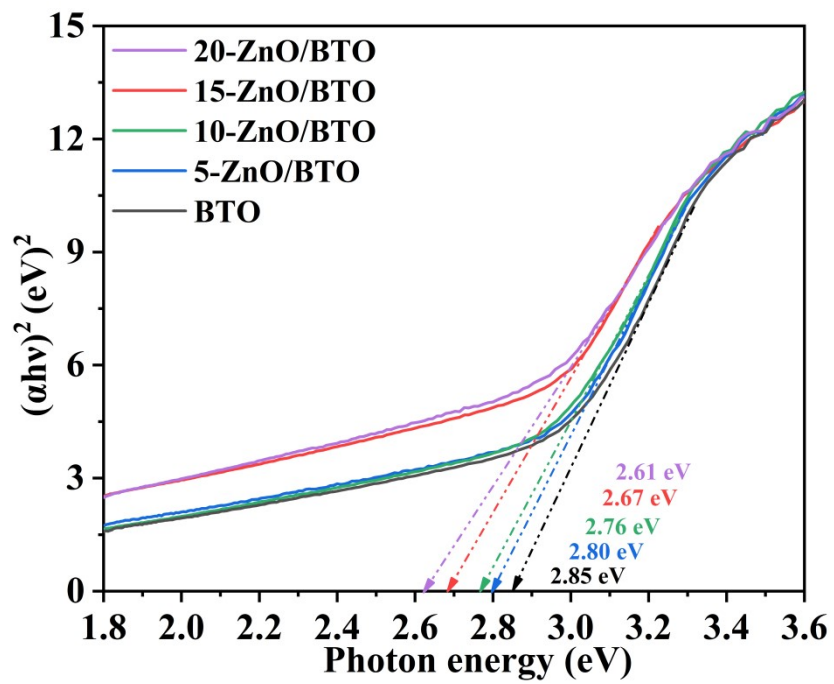

Fig. S6. Tauc plots for band gap calculation of BTO, 5-ZnO/BTO, 10-ZnO/BTO, 15-ZnO/BTO and 20-ZnO/BTO.

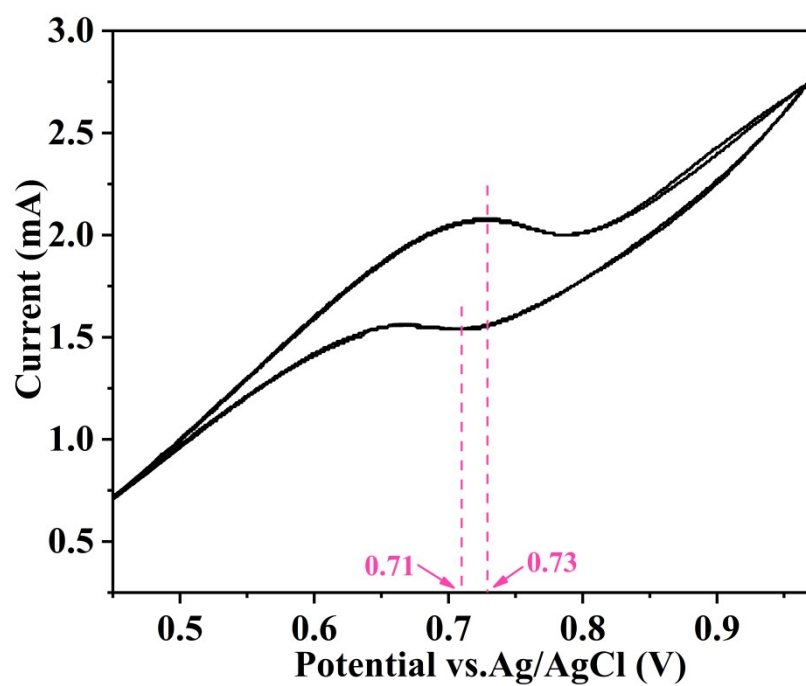

Fig. S7. The three-electrode CV curve of redox couple in electrolytes at the scan rate of 50 mV/s.

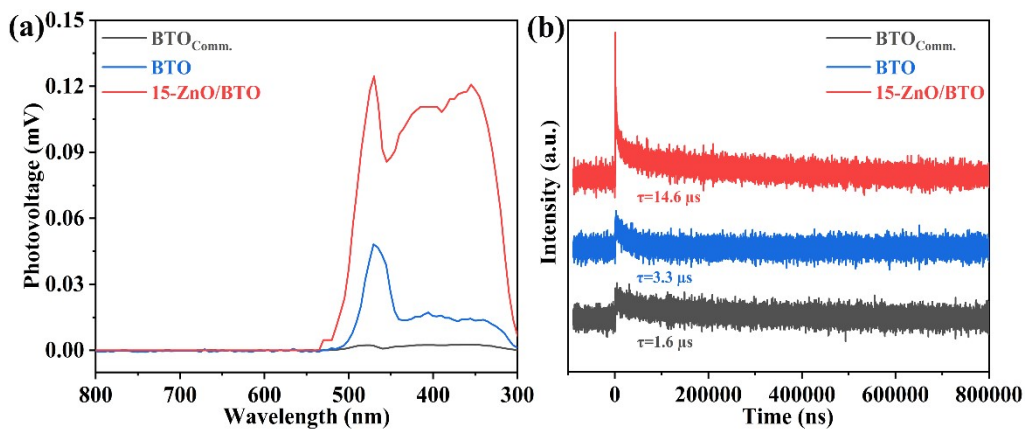

**Fig. S8.** (a) SPV spectroscopy of BTOComm, BTO, and 15- ZnO/BTO; (b) SPV spectroscopy of BTOComm, BTO, and 15- ZnO/BTO.

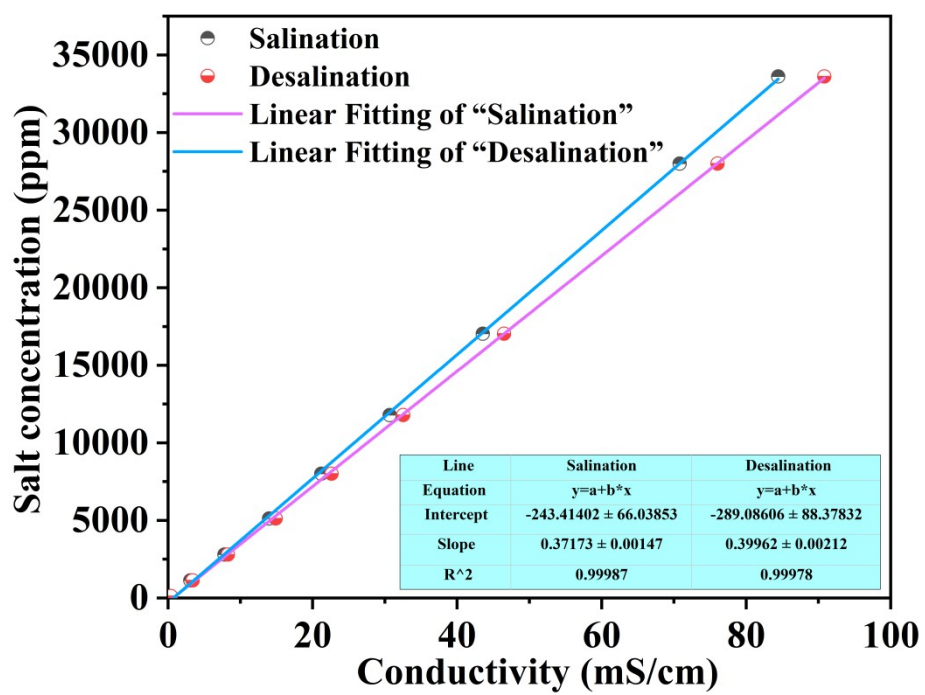

Fig. S9. Calibration curve relating NaCl concentration to conductivity.

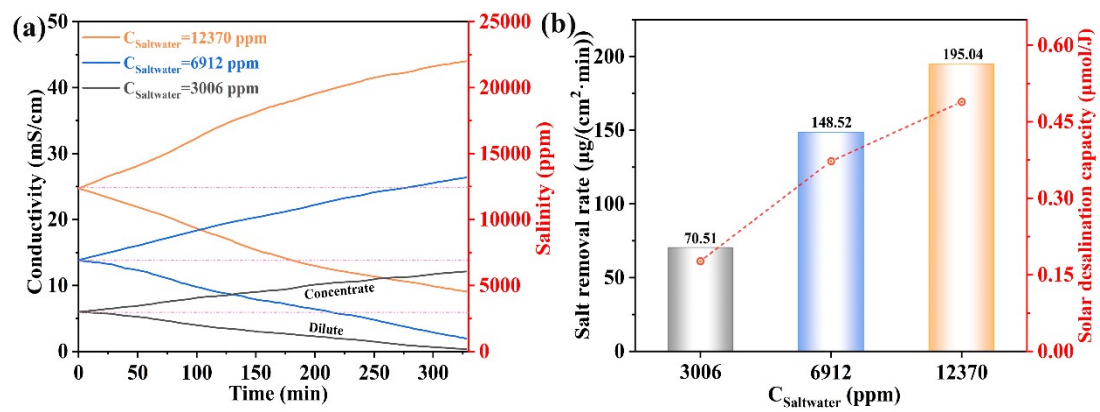

**Fig. S10.** (a) Conductivity Variations and Brine Concentrations During Desalination of Coal Chemical High-Salinity Wastewater with Different Initial Concentrations (3006, 6912, and 12370 ppm); (b) Desalination Performance of Coal Chemical High-Salinity Wastewater with Different Initial Concentrations (3006, 6912, and 12370 ppm).

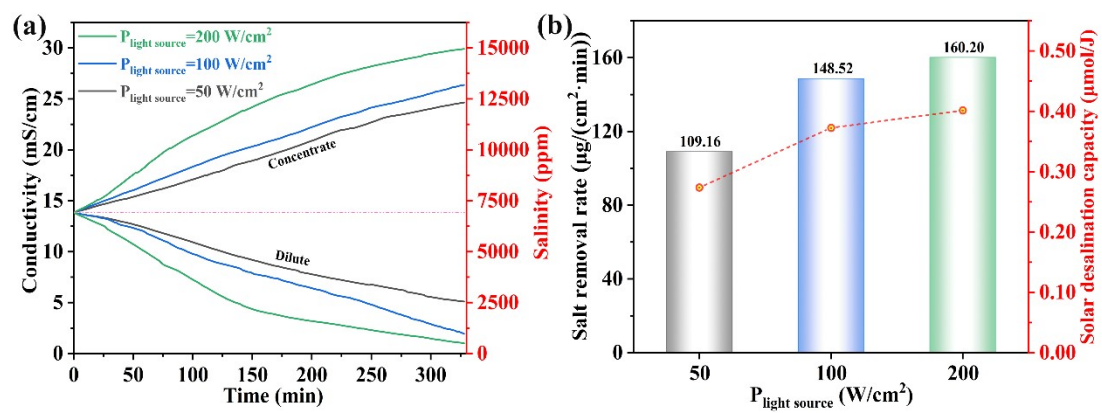

**Fig. S11.** (a) Influence of Different Light Intensities (50, 100, and 200 mW/cm<sup>2</sup>) on Conductivity Variations and Brine Concentrations During Desalination of Coal Chemical High-Salinity Wastewater; (b) Desalination Performance of Coal Chemical High-Salinity Wastewater Under Different Light Intensities (50, 100, and 200 mW/cm<sup>2</sup>).

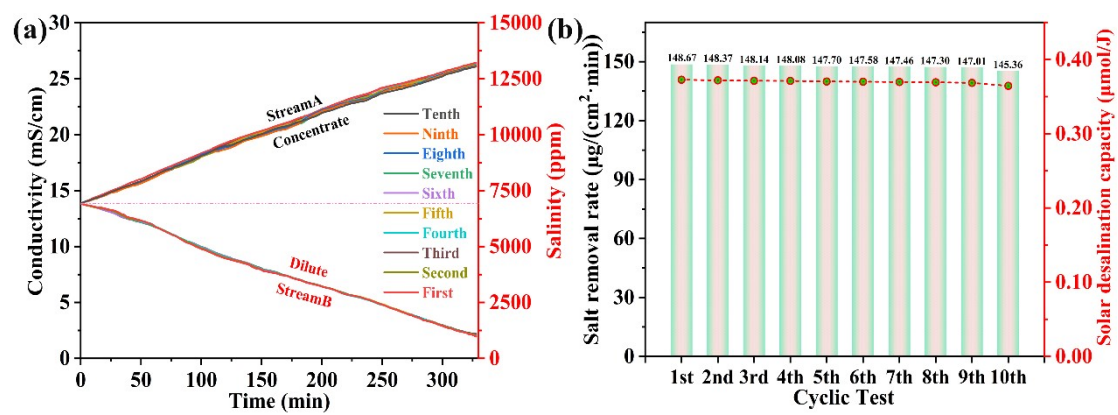

**Fig. S12.** (a) Conductivity changes and salt concentration of the 15-ZnO/BTO photoanode during ten cyclic testing; (b) Desalination performance of the 15-ZnO/BTO photoanode during ten cycling tests.

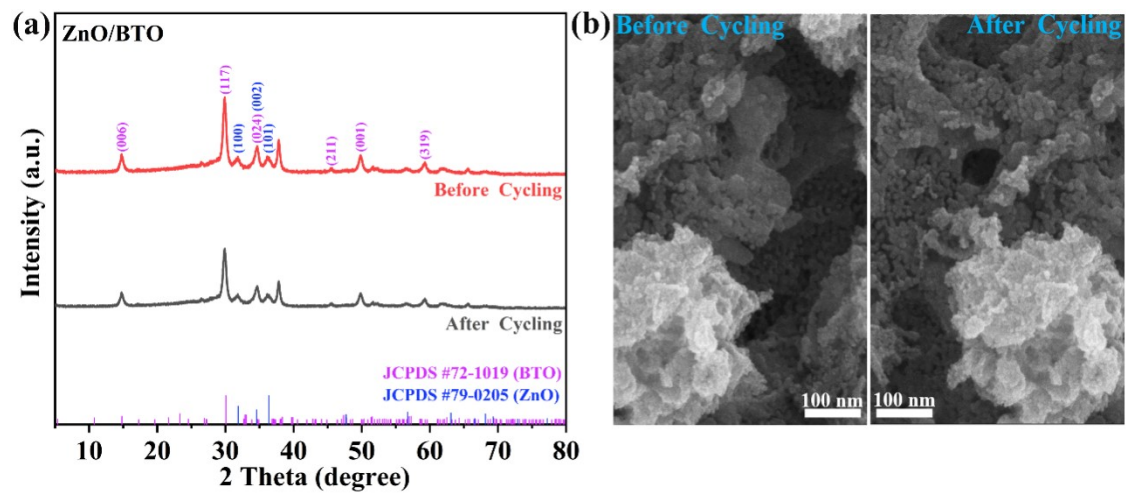

Fig. S13. (a) XRD patterns of 15-ZnO/BTO before/after cycling experiment, (b) SEM images of 15-ZnO/BTO before cycling and after cycling.

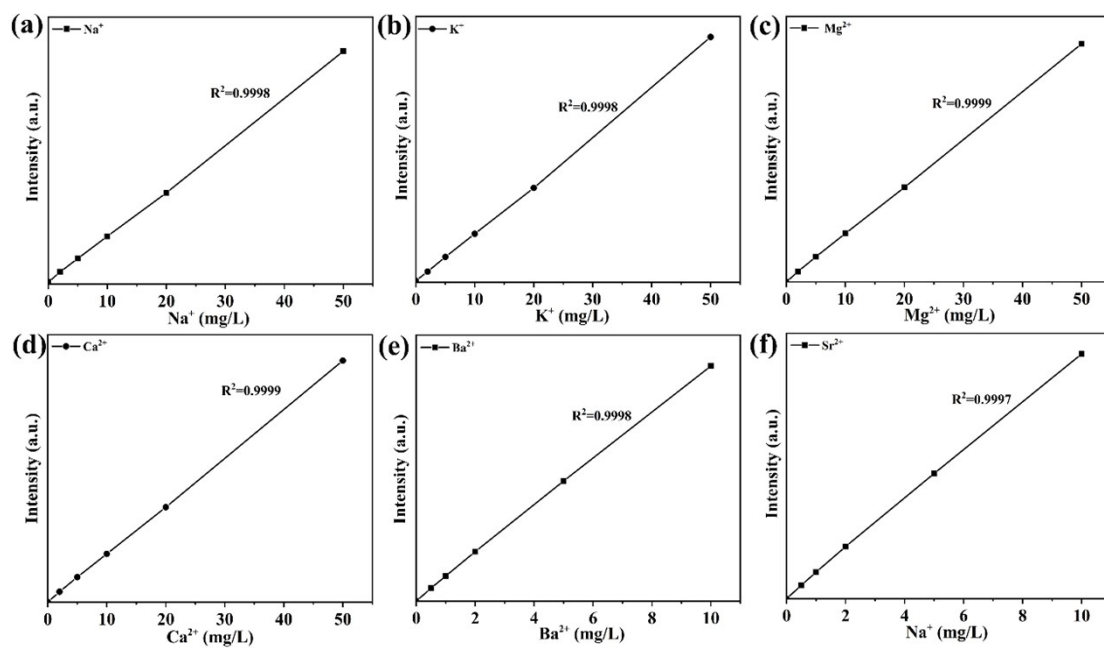

Fig. S14. Calibration curves for ion quantification.

**Table S1.** List of abbreviation.

| Abbreviation | Full name                                                |
|--------------|----------------------------------------------------------|
| BTO          | $\text{Bi}_4\text{Ti}_3\text{O}_{12}$                    |
| SDS          | Sodium dodecyl sulfate                                   |
| DMPO         | 5,5-dimethyl-1-pyrroline-N-oxide                         |
| TEMPO        | 2,2,6,6-tetramethyl-1-piperidinyloxy                     |
| CB           | conduction band                                          |
| VB           | valence band                                             |
| CV           | cyclic voltammetry                                       |
| Biv          | Bi vacancy                                               |
| Ov           | O vacancy                                                |
| PA-ED        | Photoanode-Assisted Electrochemical Desalination         |
| PEC          | Photo-Electro-Chemistry                                  |
| EIS          | electrochemical impedance spectroscopy                   |
| OCP-t        | open-circuit voltage experiment                          |
| SEM          | Scanning electron microscopy                             |
| TEM          | Transmission electron microscopy                         |
| XRD          | X-Ray Powder Diffraction                                 |
| XPS          | X-ray photoelectron spectroscopy                         |
| EPR          | Electron Paramagnetic Resonance                          |
| SI-XPS       | in-situ irradiation XPS                                  |
| IC           | ion chromatography                                       |
| ICP-OES      | Inductively coupled plasma optical emission spectrometry |

**Table S2.** Salt removal rates and photocurrent data for BTOComm., BTO and 15-ZnO/BTO photoanodes.

| Electrode            | Salt removal rate<br>( $\mu\text{g}/(\text{cm}^2 \cdot \text{min})$ ) | Initial photocurrent<br>densities ( $\text{mA}/\text{cm}^2$ ) | Photocurrent density variation range<br>( $\text{mA}/\text{cm}^2$ ) |
|----------------------|-----------------------------------------------------------------------|---------------------------------------------------------------|---------------------------------------------------------------------|
| BTO <sub>Comm.</sub> | 44.20                                                                 | 3.42                                                          | 3.21                                                                |
| BTO                  | 89.50                                                                 | 3.70                                                          | 1.54                                                                |
| 15-ZnO/BTO           | 148.52                                                                | 4.65                                                          | 1.25                                                                |

**Table S3.** ICP-OES results of leached ions in different streams after desalination.

| Electrode        | BTO                            |                             |                                  | 15-ZnO/BTO                     |                             |                                  |
|------------------|--------------------------------|-----------------------------|----------------------------------|--------------------------------|-----------------------------|----------------------------------|
|                  | Redox<br>Electrolyte<br>(mg/L) | Diluted<br>stream<br>(mg/L) | Concentrated<br>stream<br>(mg/L) | Redox<br>Electrolyte<br>(mg/L) | Diluted<br>stream<br>(mg/L) | Concentrated<br>stream<br>(mg/L) |
| Bi <sup>3+</sup> | 0.0021                         | -                           | 0.0001                           | -                              | -                           | -                                |
| Ti <sup>4+</sup> | 0.0031                         | -                           | 0.0004                           | -                              | -                           | -                                |
| Zn <sup>2+</sup> | /                              | /                           | /                                | -                              | -                           | -                                |

**Table S4.** Initial and final water quality of the high-salinity wastewater treated by SD-PED.

| Item                          | Unit  | Initial | Diluted stream | Removal efficiency |
|-------------------------------|-------|---------|----------------|--------------------|
| Conductivity                  | mS/cm | 13.96   | 1.66           | 88.10              |
| Na <sup>+</sup>               | ppm   | 3430.95 | 312.00         | 90.91              |
| Ca <sup>2+</sup>              | ppm   | 82.94   | 9.06           | 89.07              |
| K <sup>+</sup>                | ppm   | 40.48   | 3.68           | 90.90              |
| Mg <sup>2+</sup>              | ppm   | 5.92    | 0.70           | 88.06              |
| Sr <sup>2+</sup>              | ppm   | 1.25    | 0.15           | 87.64              |
| Ba <sup>2+</sup>              | ppm   | 0.042   | 0.004          | 90.47              |
| Cl <sup>-</sup>               | ppm   | 5253.30 | 495.93         | 90.56              |
| NO <sub>3</sub> <sup>-</sup>  | ppm   | 247.01  | 23.95          | 90.30              |
| CO <sub>3</sub> <sup>2-</sup> | ppm   | -       | -              | -                  |
| SO <sub>4</sub> <sup>2-</sup> | ppm   | -       | -              | -                  |

**Table S5.** Summary of solar desalination performance in this work.

| Electrode            | Salt concentration (ppm) | Desalination rate ( $\mu\text{g}\cdot\text{cm}^{-2}\cdot\text{min}^{-1}$ ) | Specific power of the light source ( $\text{W}/\text{cm}^2$ ) | Solar desalination capacity( $\mu\text{mol}/\text{J}$ ) |
|----------------------|--------------------------|----------------------------------------------------------------------------|---------------------------------------------------------------|---------------------------------------------------------|
| BTO <sub>Comm.</sub> | 6912                     | 44.20                                                                      | 100                                                           | 0.116                                                   |
| BTO-10               | 6912                     | 54.53                                                                      | 100                                                           | 0.125                                                   |
| BTO-20               | 6912                     | 63.55                                                                      | 100                                                           | 0.131                                                   |
| BTO-30               | 6912                     | 89.50                                                                      | 100                                                           | 0.205                                                   |
| BTO-40               | 6912                     | 79.26                                                                      | 100                                                           | 0.177                                                   |
| BTO-50               | 6912                     | 69.30                                                                      | 100                                                           | 0.147                                                   |
| 5-ZnO/BTO            | 6912                     | 105.93                                                                     | 100                                                           | 0.252                                                   |
| 10-ZnO/BTO           | 6912                     | 124.66                                                                     | 100                                                           | 0.306                                                   |
| 15-ZnO/BTO           | 6912                     | 148.52                                                                     | 100                                                           | 0.365                                                   |
| 20-ZnO/BTO           | 6912                     | 132.05                                                                     | 100                                                           | 0.328                                                   |

**Table S6.** Comparison with recent reports on solar-driven photoelectrochemical desalination.

| Electrode                                             | Redox couple                       | Salt concentration (ppm) | Photocurrent density (mA) | Desalination rate ( $\mu\text{gcm}^{-2}\text{min}^{-1}$ ) | Specific power of the light source ( $\text{W}/\text{cm}^2$ ) | Solar desalination capacity ( $\mu\text{mol}/\text{J}$ ) | Publication time | Reference |
|-------------------------------------------------------|------------------------------------|--------------------------|---------------------------|-----------------------------------------------------------|---------------------------------------------------------------|----------------------------------------------------------|------------------|-----------|
| ZnO/BTO                                               | $\text{I}^-/\text{I}_3^-$          | 6912                     | 4.65                      | 148.52                                                    | 100                                                           | 0.365                                                    | /                | This work |
| CuBi <sub>2</sub> O <sub>4</sub> /NiO                 | $[\text{Fe}(\text{CN})_6]^{3-}/4-$ | 7400                     | 1.52                      | 54.30                                                     | 200                                                           | 0.077                                                    | 2026             | 1         |
| NiO/CuInS <sub>2</sub>                                | $[\text{Fe}(\text{CN})_6]^{3-}/4-$ | 4000                     | 1.06                      | 11.91                                                     | 106                                                           | 0.032                                                    | 2025             | 2         |
| NiO@Co <sub>3</sub> O <sub>4</sub> /BiVO <sub>4</sub> | $\text{I}^-/\text{I}_3^-$          | 3230                     | 3.01                      | 88.76                                                     | 100                                                           | 0.231                                                    | 2025             | 3         |
| CeO <sub>2</sub> /BiVO <sub>4</sub> /MoO <sub>3</sub> | $[\text{Fe}(\text{CN})_6]^{3-}/4-$ | 5000                     | 4.52                      | 107.43                                                    | 100                                                           | 0.135                                                    | 2025             | 4         |
| Co <sub>3</sub> O <sub>4</sub> @NC/BiVO <sub>4</sub>  | $\text{I}^-/\text{I}_3^-$          | 2013                     | 2.40                      | 69.01                                                     | 100                                                           | 0.187                                                    | 2025             | 5         |
| Fe <sub>2</sub> O <sub>3</sub> /BiVO <sub>4</sub>     | $\text{I}^-/\text{I}_3^-$          | 1350                     | 1.92                      | 44.62                                                     | 100                                                           | 0.127                                                    | 2024             | 6         |
| WO <sub>3</sub> /BiVO <sub>4</sub>                    | $\text{I}^-/\text{I}_3^-$          | 4000                     | 2.93                      | 65.03                                                     | 200                                                           | 0.093                                                    | 2023             | 7         |
| FeMn-PBA@MXene                                        | $[\text{Fe}(\text{CN})_6]^{3-}/4-$ | 4000                     | 1.23                      | 27.75                                                     | 200                                                           | 0.006                                                    | 2023             | 8         |
| CdS/BiVO <sub>4</sub>                                 | $\text{I}^-/\text{I}_3^-$          | 4000                     | 2.58                      | 57.30                                                     | 232                                                           | 0.070                                                    | 2022             | 9         |
| Bi <sub>2</sub> O <sub>3</sub> /N719                  | $[\text{Fe}(\text{CN})_6]^{3-}/4-$ | 4000                     | 2.60                      | 43.78                                                     | 153                                                           | 0.210                                                    | 2020             | 10        |

**Table S7.** Economic cost for SD-PED device in this work.

|                          | Item                                         | Unit price               | Consumption<br>(This work) | Cost                      |
|--------------------------|----------------------------------------------|--------------------------|----------------------------|---------------------------|
| Upfront cost             | PTFE capillaries                             | 0.14 USD·m <sup>-1</sup> | 50 cm                      | 0.07 USD                  |
|                          | Silicone gaskets                             | 95 USD/·m <sup>2</sup>   | 72 cm <sup>2</sup>         | 0.69 USD                  |
|                          | Chamber                                      | /                        | 4 pieces                   | 34.0 USD                  |
| Consumables              | Ion exchange<br>membrane<br>(AEM, CEM)       | 327 USD/·m <sup>2</sup>  | 22 cm <sup>2</sup>         | 0.70 USD                  |
|                          | I <sup>-</sup> /I <sup>3-</sup> -electrolyte | 6.0 USD·L <sup>-1</sup>  | 50 ml                      | 0.30 USD                  |
|                          | Total cost                                   | /                        | /                          | 35.5 USD                  |
| Energy cost              | Power consumption<br>(Peristaltic pump)      | 0.09 W × 3               | 6.0 h<br>(in 6912 ppm)     | 1.62 W·h                  |
| Energy consumption       |                                              | 1.62 W·h                 | 10 mL                      | 162.0 kW·h/m <sup>3</sup> |
| Water Production<br>Cost | /                                            | 0.093 USD/ kW·h          | 1 m <sup>3</sup>           | 15.0 USD/m <sup>3</sup>   |
|                          | Desalination rate                            | /                        | 0.48 mL/h                  | /                         |

**Table S8.** Comparative assessment of energy efficiency and overall system cost for SD-PED technology versus conventional desalination technologies (electricity cost: 0.093 USD/ kW·h).

| Desalination technology | Energy consumption (kW·h/m <sup>3</sup> ) | Water Production Cost (USD/m <sup>3</sup> ) | Key feature         | References        |
|-------------------------|-------------------------------------------|---------------------------------------------|---------------------|-------------------|
| SD-PED                  | 162.0                                     | 15.0                                        | Photovoltaic-driven | This Work         |
| RO                      | 2.91-6.0                                  | 0.45-1.72                                   | Electric-driven     | <sup>11</sup>     |
| ED                      | ~4.11                                     | ~0.55                                       | Electric-driven     | <sup>11, 12</sup> |
| MED                     | ~25.0                                     | ~1.28                                       | Thermal-driven      | <sup>13</sup>     |
| MSF                     | 23.1-25.5                                 | 0.96 - 2.83                                 | Thermal-driven      | <sup>12, 13</sup> |

## References

1. S. Yuan, M. Luo, W. Zhou, J. Li, Y. Cao, K. S. Hui, Y. Yang, Y. Wang, X. Li, Y. Yang, F. Chen, Ammonium ion-assisted electrodeposition of  $\text{CuBi}_2\text{O}_4/\text{NiO}$  photocathodes for efficient photoelectrochemical desalination, *Desalination*, 2026, **627**, 120023.
2. X. Wang, Y. Wang, X. Chen, L. Liu, K. S. Hui, L. Guo, M. Luo and F. Chen, Photocathode-assisted desalination device based on  $\text{NiO}/\text{CuInS}_2$  heterostructure, *Journal of Environmental Chemical Engineering*, 2025, **13** (5), 117925.
3. J. Li, M. Luo, S. Yuan, X. Hai, Y. Zhao, F. Chen, J. Han, X. Li and Y. Yang, In-situ engineered Ni-Co bimetallic hole transport layers for enhanced photoelectrochemical desalination performance, *Desalination*, 2025, **613**, 119106.
4. S. Yuan, M. Luo, Y. Cao, J. Li, X. Wu, J. Han, Y. Yang, X. Li and F. Chen, Three-phase heterostructure photoanode of  $\text{CeO}_2/\text{BiVO}_4/\text{MoO}_3$  for enhanced photo-electrochemical desalination, *Chemical Engineering Journal*, 2025, **515**, 163436.
5. J. Li, S. Yuan, X. Zhang, F. Chen, Y. Yang, J. Kang, Y. He, J. Han, X. Li, Y. Yang and M. Luo, Enhanced photoelectric desalination of  $\text{Co}_3\text{O}_4@\text{NC}/\text{BiVO}_4$  photoanode via in-situ construction of hole transport layer, *Journal of Colloid and Interface Science*, 2025, **680**, 11-23.
6. S. Yuan, W. Ding, J. Li, X. Wang, Y. Zhang, Y. Zhao, F. Chen, X. Li and M. Luo, Design and Construction of the  $\text{Fe}_2\text{O}_3/\text{BiVO}_4$  Heterostructure-Based Photoanode for Photo-Electrochemical Desalination, *ACS Sustainable Chemistry & Engineering*, 2024, **12** (16), 6330-6342.
7. J. Zhang, Y. Zi, W. Shan, P. Songsirithigul, M. Luo, T. Z. Oo, M. Zaw, N. W. Lwin, S. H. Aung, G. Ying and F. Chen, The solar-driven redox seawater desalination based on the stable and environmentally friendly  $\text{WO}_3/\text{BiVO}_4$  photoanode, *Desalination*, 2023, **566**, 116939.
8. H. Hu, H. Lin, X. Chen, Y. Pan, X. Li, Z. Zhuang, H. Chen, X. Wang, M. Luo, K. Zheng, L. Zhang and F. Chen, Fe, Mn-Prussian blue analogue@MXene composites for efficient photocatalytic peroxydisulfate-activated degradation of tetracycline hydrochloride and photoelectrochemical desalination, *Chemical Engineering Journal*, 2023, **476**, 146682.
9. M. Liang, J. Zhang, K. Ramalingam, Q. Wei, K. San Hui, S. Htike Aung, K. Nam Hui and F. Chen, Stable and efficient self-sustained photoelectrochemical desalination based on CdS QDs/ $\text{BiVO}_4$  heterostructure, *Chemical Engineering Journal*, 2022, **429**, 132168.
10. J. Zhang, X. Wang, M. Liang, M. Han, J. Dai, Q. Wei, T. Z. Oo, S. H. Aung, K. N. Hui and F. Chen, High-Performance Photoelectrochemical Desalination Based on the Dye-Sensitized  $\text{Bi}_2\text{O}_3$  Anode, *ACS Applied Materials & Interfaces*, 2022, **14** (29), 33024-33031.
11. C. El Younossi, A. El Fadar, Y. Elaouzy, Comprehensive investigation of desalination technologies considering numerous plants worldwide, *Applied Thermal Engineering*, 2025, **278**, 127216.

12. Q. N. Al-Oweiti, O. G. Kaoud, M. H. Elbassoussi, S. M. Zubair, Techno-economic evaluation of hybrid multi-effect and membrane desalination systems for improved water production, *Energy Conversion and Management*, 2026, **347**,120548.
13. B. Benhala, F. Loirdighi, A. Assir, M. El Khaili, H. Nhaila, A. Raihani, M. Qbadou, A. Sallem, Comparative Analysis of Desalination Technologies: Energy Performance and Renewable Energy Integration with Focus on Reverse Osmosis Systems, *E3S Web of Conferences*, 2025, **680**, 00031.
